# Supplementary material for: Differential gene expression in leaves and roots of Hydrangea serrata treated with aluminium chloride
Source: Frontiers journal article supplement (doi:10.3389/fpls.2024.1412189), 2024-09-03
Supplement: Data_Sheet_2.pdf [file Data_Sheet_2.pdf]

# Differential gene expression in leaves and roots of *Hydrangea serrata* treated with aluminium chloride

**Anna-Catharina Scholpp<sup>1</sup>, Hanna Marie Schilbert<sup>2</sup>, Prisca Viehöver<sup>2</sup>, Bernd Weisshaar<sup>2</sup>, Michael Beckstette<sup>3</sup>, Judith Martha Neumann<sup>1</sup>, Hanna Bednarz<sup>1,4</sup> & Karsten Niehaus<sup>1\*</sup>**

1 Metabolome- and Proteome Research, Faculty of Biology & CeBiTec, Bielefeld University

2 Genetics and Genomics of Plants, Faculty of Biology, CeBiTec, Bielefeld University

3 Center for Biotechnology (CeBiTec), Faculty of Technology, Bielefeld University

4 Medical School OWL, AG 3 Anatomy and Cell Biology

## Supplementary Material and Methods

### Sample preparation for LC-MS measurement

*Hydrangea serrata* freeze dried tissue material was analysed for dihydroisocoumarins with focus on relative hydrangenol, phyllodulcin, hydrangeic acid and their glycosidic contents. 200 mg  $\pm$  10 mg of each replicate was ground and combined with 500 mg of 1 mm Zirconia beads. 1 mL of ice cold 80 % methanol including naringenin (Carl Roth, Karlsruhe, Germany) as internal standard with final concentration 0.04 mg/mL was added. The mixture was ribolysed 3x6000 rpm 30 sec pause and extracted at 4 °C, overnight. After centrifugation 14600 rpm for 20 min the particle free supernatant was transferred into fresh tubes. To the leave extracts was added 1 mL of n-Hexane. The solution was mixed by inverting 15x and then let separate the solvent phases. The lower methanol phase was transferred into a fresh tube. For further precipitation of still solved impurities, the extracts were stored over night at 4 °C and centrifuged the next day. The clear supernatant was transferred into glass vials with septum (WICOM, Heppenheim, Germany) and used for mass spectrometry measurement.

**Table 1.** UHPLC-ESI-QToF-MS settings and gradient for dihydroisocoumarin separation

**LC parameters**

|                         |                                                                                               |
|-------------------------|-----------------------------------------------------------------------------------------------|
| solvents                | <b>A</b> HPLC grade Water + 0.1 % formate<br><b>B</b> HPLC grade Acetonitrile + 0.1 % formate |
| flow                    | 0.45 mL/min                                                                                   |
| column oven temperature | 40 °C                                                                                         |
| injection volume        | 10 µL                                                                                         |

**ESI-MS parameters**

|                                 |              |
|---------------------------------|--------------|
| dry gas                         | 8 L/min      |
| nebulizer gas                   | 3 Bar        |
| dry temperature                 | 180 °C       |
| mass detection range            | 120-1000 m/z |
| collision cell collision energy | 40 eV        |

## Supplementary Results and Figures

Relative DH content in *Hydrangea serrata* roots and leaves. UHPLC-ESI-QToF-MS analysis revealed a tissue specific profile.

**Figure 1.** TIC (total ion chromatogram) of methanolic *Hydrangea serrata* root extracts in UHPLC-ESI-QToF-MS measurement for dihydroisocoumarin profiling. Turquoise spectra indicate samples from aluminium chloride ( $\text{AlCl}_3$ ) treated plants in comparison to the red spectra, which indicate control.

**Figure 2.** TIC (total ion chromatogram) of methanolic *Hydrangea serrata* leaf extracts in UHPLC-ESI-QToF-MS measurement for dihydroisocoumarin profiling. Blue spectra indicate samples from aluminium chloride ( $\text{AlCl}_3$ ) treated plants in comparison to the orange spectra, which indicate control.

**Figure 3.** Methanolic extracts from aluminium chloride ( $\text{AlCl}_3$ ) treated *Hydrangea serrata* roots and control roots in UHPLC-ESI-QToF-MS measurement for dihydroisocoumarin profiling. Hydrangenol, hydrangenol-glycoside, hydrangenol-diglycoside, phyllodulcin and phyllodulcin-glycoside were identified in root extracts but there is no difference in samples from  $\text{AlCl}_3$  treatment group compared to control. Glycosides and dihydroisocoumarins modified with disaccharide eluate at different retention times. The chromatogram shows the elution profile of the two dihydroisocoumarins assessed as hydrangenol  $[\text{M-H}^+]$  255.06 m/z and  $[\text{M-H}^+]$  phyllodulcin 285.16 m/z obtained by extracted ion chromatogram (EIC) over a run of 55 min. Hydrangeic acid and hydrangenol are isobars. Hydrangeic acid should elute at shorter different retention time because it has a carboxylic acid group instead of the closed ring.

**Figure 4.** Mass spectrum of dihydroisocoumarin assessed as hydrangenol  $[\text{M-H}^+]$  255.0662 m/z and hydrangenol-glycoside 417.12 m/z, as well as hydrangenol-diglycoside 589.20 m/z. Glc indicates modification of the metabolite with a molecule of 162 Da which is the mass of a hexose attached via glycosidic bond. Suc indicates the modification with the disaccharide sucrose.

**Figure 5.** Methanolic extracts from aluminium chloride ( $\text{AlCl}_3$ ) treated *Hydrangea serrata* leaves and control leaves in UHPLC-ESI-QToF-MS measurement for dihydroisocoumarin profiling. Hydrangenol, hydrangenol-glycoside, phyllodulcin, phyllodulcin-glycoside and phyllodulcin-diglycoside were identified. Phyllodulcin is more present in leaf extracts compared to hydrangenol. There is no dihydroisocoumarin relative content difference in  $\text{AlCl}_3$  treatment compared to control. Glycosides and dihydroisocoumarins modified with disaccharide eluate at different retention times. The chromatogram shows the elution profile of the two dihydroisocoumarins assessed as hydrangenol  $[\text{M-H}^+]$  255.06 m/z and  $[\text{M-H}^+]$  phyllodulcin 285.16 m/z obtained by extracted ion chromatogram (EIC) over a run of 55 min.

**Figure 6.** Extracted ion count chromatogram of dihydroisocoumarin assessed as  $[\text{M-H}^+]$  phyllodulcin-diglycoside 627.19 m/z.

**Figure 7.** Mass spectrum of dihydroisocoumarin assessed as phyllodulcin  $[\text{M-H}^+]$  285.0758 m/z and phyllodulcin-glycoside 447.20 m/z as well as phyllodulcin-diglycoside 627.19 m/z. Glc indicates modification of the metabolite with a molecule of 162 Da which is the mass of a hexose attached via glycosidic bond. to Suc indicates the modification with the disaccharide sucrose. Methanolic extracts from aluminium chloride ( $\text{AlCl}_3$ ) treated *Hydrangea serrata* leaves and control leaves in UHPLC-ESI-QToF-MS measurement for dihydroisocoumarin profiling.

## Comparison of homology

580,770 contigs were obtained from the Trinity *de novo* assembly. The accession of Trinity IDs encodes the Trinity “gene” and “isoform” information. At the contig level of transcripts, it is not possible to resolve the number of alleles and/or paralogs for one gene without reference genome.

As one example, the level of phylogeny was compared of all contigs (CDS) which were functionally annotated as *pal*. A multiple sequence alignment on cDNA level was made using clustalW (<https://www.genome.jp/tools-bin/clustalw>). The phylogenetic analysis pipeline by ETE3 on GenomeNet (<https://www.genome.jp/tools/ete/>) was used to do an alignment and phylogenetic constructions using ETE3 3.1.2 (Huerta-Cepas et al., 2016).

A phylogram was constructed and visualised using fasttree (Price et al., 2010). This phylogram of all fiftyfive contigs which were functionally annotated as *pal* (phenylalanine ammonia lyase) from the *de novo* transcriptome of *H. serrata*. The values at the tree nodes are SH-like for maximum likelihood. The Trinity IDs with the same main number from one gene cluster (c) which were assigned as “isoforms” (i) show small distances in the tree.
